# Supplementary material for: Understanding Coding and Payment for Psychiatrists’ Services: How We Got Here and Where We’re Going
Source: Atypon-hosted journal article supplement (doi:10.1176/appi.focus.20180002), 2018-10-01
Supplement: appi.focus.20180002.ds001.pdf [file appi.focus.20180002.ds001.pdf]

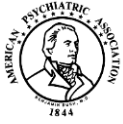

## Evaluation and Management Services Guide Coding by Key Components

CPT® five-digit codes, descriptions, and other data only are copyright 2012 by the American Medical Association (AMA). All Rights Reserved. No fee schedules, basic units, relative values or related listings are included in CPT®. CPT® is a registered trademark of the American Medical Association (AMA).

|         |                             |                                                                                                          |                                            |                                                                                                                                                                                                                                    |                                       |
|---------|-----------------------------|----------------------------------------------------------------------------------------------------------|--------------------------------------------|------------------------------------------------------------------------------------------------------------------------------------------------------------------------------------------------------------------------------------|---------------------------------------|
| History | <b>Chief Complaint (CC)</b> | <b>History of present illness (HPI)</b>                                                                  | <b>Past, family, social history (PFSH)</b> | <b>Review of systems (ROS)</b>                                                                                                                                                                                                     |                                       |
|         | Reason for the visit        | Location; Severity; Timing; Quality; Duration; Context; Modifying Factors; Associated signs and symptoms | Past medical; Family medical; Social       | Constitutional; Eyes; Ears, Nose, Mouth, and Throat; Cardiovascular; Respiratory; Genitourinary; Musculoskeletal; Gastrointestinal; Skin/Breast; Neurological; Psychiatric; Endocrine; Hematologic/Lymphatic; Allergic/Immunologic |                                       |
|         | <b>CC</b>                   | <b>HPI</b>                                                                                               | <b>PFSH</b>                                | <b>ROS</b>                                                                                                                                                                                                                         | <b>History Type</b>                   |
|         | Yes                         | <i>Brief</i><br>(1-3 elements or 1-2 chronic conditions)                                                 | N/A                                        | N/A                                                                                                                                                                                                                                | <i>Problem focused (PF)</i>           |
|         |                             | <i>Extended</i><br>(4 elements or 3 chronic conditions)                                                  | <i>Pertinent</i><br>(1 element)            | <i>Extended</i><br>(2-9 systems)                                                                                                                                                                                                   | <i>Expanded problem focused (EPF)</i> |
|         |                             | <i>Complete</i><br>(2 elements (est) or 3 elements (new/initial))                                        | <i>Complete</i><br>(10-14 systems)         | <i>Detailed (DET)</i>                                                                                                                                                                                                              |                                       |
|         |                             |                                                                                                          |                                            | <i>Comprehensive (COMP)</i>                                                                                                                                                                                                        |                                       |

  

|                                                                                                             |                                                                                                                                                                                                 |                                                                                                                                                                                                                                                                                                                                                                                                                                                                                                                                                              |                                                                                                                                                                                                 |                                                                                                                                                                                       |
|-------------------------------------------------------------------------------------------------------------|-------------------------------------------------------------------------------------------------------------------------------------------------------------------------------------------------|--------------------------------------------------------------------------------------------------------------------------------------------------------------------------------------------------------------------------------------------------------------------------------------------------------------------------------------------------------------------------------------------------------------------------------------------------------------------------------------------------------------------------------------------------------------|-------------------------------------------------------------------------------------------------------------------------------------------------------------------------------------------------|---------------------------------------------------------------------------------------------------------------------------------------------------------------------------------------|
| Examination                                                                                                 | <b>System/body area</b>                                                                                                                                                                         | <b>Examination</b>                                                                                                                                                                                                                                                                                                                                                                                                                                                                                                                                           |                                                                                                                                                                                                 |                                                                                                                                                                                       |
|                                                                                                             | Constitutional                                                                                                                                                                                  | <ul style="list-style-type: none"> <li>3/7 vital signs: sitting or standing BP, supine BP, pulse rate and regularity, respiration, temperature, height, weight</li> <li>General appearance</li> </ul>                                                                                                                                                                                                                                                                                                                                                        |                                                                                                                                                                                                 |                                                                                                                                                                                       |
|                                                                                                             | Musculoskeletal                                                                                                                                                                                 | <ul style="list-style-type: none"> <li>Muscle strength and tone</li> <li>Gait and station</li> </ul>                                                                                                                                                                                                                                                                                                                                                                                                                                                         |                                                                                                                                                                                                 |                                                                                                                                                                                       |
|                                                                                                             | Psychiatric                                                                                                                                                                                     | <table style="width: 100%; border: none;"> <tr> <td style="vertical-align: top; width: 50%;"> <ul style="list-style-type: none"> <li>Speech</li> <li>Thought process</li> <li>Associations</li> <li>Abnormal/psychotic thoughts</li> <li>Judgment and insight</li> <li>Orientation</li> </ul> </td> <td style="vertical-align: top; width: 50%;"> <ul style="list-style-type: none"> <li>Recent and remote memory</li> <li>Attention and concentration</li> <li>Language</li> <li>Fund of knowledge</li> <li>Mood and affect</li> </ul> </td> </tr> </table> | <ul style="list-style-type: none"> <li>Speech</li> <li>Thought process</li> <li>Associations</li> <li>Abnormal/psychotic thoughts</li> <li>Judgment and insight</li> <li>Orientation</li> </ul> | <ul style="list-style-type: none"> <li>Recent and remote memory</li> <li>Attention and concentration</li> <li>Language</li> <li>Fund of knowledge</li> <li>Mood and affect</li> </ul> |
|                                                                                                             | <ul style="list-style-type: none"> <li>Speech</li> <li>Thought process</li> <li>Associations</li> <li>Abnormal/psychotic thoughts</li> <li>Judgment and insight</li> <li>Orientation</li> </ul> | <ul style="list-style-type: none"> <li>Recent and remote memory</li> <li>Attention and concentration</li> <li>Language</li> <li>Fund of knowledge</li> <li>Mood and affect</li> </ul>                                                                                                                                                                                                                                                                                                                                                                        |                                                                                                                                                                                                 |                                                                                                                                                                                       |
|                                                                                                             | <b>Examination Elements</b>                                                                                                                                                                     |                                                                                                                                                                                                                                                                                                                                                                                                                                                                                                                                                              | <b>Examination type</b>                                                                                                                                                                         |                                                                                                                                                                                       |
|                                                                                                             | 1-5 bullets                                                                                                                                                                                     |                                                                                                                                                                                                                                                                                                                                                                                                                                                                                                                                                              | <i>Problem focused (PF)</i>                                                                                                                                                                     |                                                                                                                                                                                       |
| At least 6 bullets                                                                                          |                                                                                                                                                                                                 | <i>Expanded problem focused (EPF)</i>                                                                                                                                                                                                                                                                                                                                                                                                                                                                                                                        |                                                                                                                                                                                                 |                                                                                                                                                                                       |
| At least 9 bullets                                                                                          |                                                                                                                                                                                                 | <i>Detailed (DET)</i>                                                                                                                                                                                                                                                                                                                                                                                                                                                                                                                                        |                                                                                                                                                                                                 |                                                                                                                                                                                       |
| All bullets in Constitutional and Psychiatric (shaded) boxes and 1 bullet in Musculoskeletal (unshaded) box |                                                                                                                                                                                                 | <i>Comprehensive (COMP)</i>                                                                                                                                                                                                                                                                                                                                                                                                                                                                                                                                  |                                                                                                                                                                                                 |                                                                                                                                                                                       |

  

|                                                                                            |                                                                                                              |                           |
|--------------------------------------------------------------------------------------------|--------------------------------------------------------------------------------------------------------------|---------------------------|
| Med Dec Making                                                                             | <b>Medical Decision Making Element</b>                                                                       | <b>Determined by</b>      |
|                                                                                            | Number of diagnoses or management options                                                                    | Problem points chart      |
|                                                                                            | Amount and/or complexity of data to be reviewed                                                              | Data points chart         |
|                                                                                            | Risk of significant complications, morbidity, and/or mortality                                               | Table of risk             |
|                                                                                            | <b>Problem Points</b>                                                                                        |                           |
|                                                                                            | <b>Category of Problems/Major New symptoms</b>                                                               | <b>Points per problem</b> |
|                                                                                            | Self-limiting or minor (stable, improved, or worsening) ( <b>max=2</b> )                                     | 1                         |
|                                                                                            | Established problem (to examining physician); stable or improved                                             | 1                         |
|                                                                                            | Established problem (to examining physician); worsening                                                      | 2                         |
|                                                                                            | New problem (to examining physician); no additional workup or diagnostic procedures ordered ( <b>max=1</b> ) | 3                         |
| New problem (to examining physician); additional workup planned*                           | 4                                                                                                            |                           |
| *Additional workup does not include referring patient to another physician for future care |                                                                                                              |                           |



## Evaluation and Management Services Guide Coding by Key Components

CPT® five-digit codes, descriptions, and other data only are copyright 2012 by the American Medical Association (AMA). All Rights Reserved. No fee schedules, basic units, relative values or related listings are included in CPT®. CPT® is a registered trademark of the American Medical Association (AMA).

**Medical Decision Making**

| <b>Data Points</b>                                                                                                                                           |        |
|--------------------------------------------------------------------------------------------------------------------------------------------------------------|--------|
| Categories of Data to be Reviewed ( <b>max=1 for each</b> )                                                                                                  | Points |
| Review and/or order of clinical lab tests                                                                                                                    | 1      |
| Review and/or order of tests in the radiology section of CPT                                                                                                 | 1      |
| Review and/or order of tests in the medicine section of CPT                                                                                                  | 1      |
| Discussion of test results with performing physician                                                                                                         | 1      |
| Decision to obtain old records and/or obtain history from someone other than patient                                                                         | 1      |
| Review and summarization of old records and/or obtaining history from someone other than patient and/or discussion of case with another health care provider | 2      |
| Independent visualization of image, tracing, or specimen itself (not simply review report)                                                                   | 2      |

| <b>Table of Risk</b> |                                                                                                                                                                                                                           |                                 |                                                          |
|----------------------|---------------------------------------------------------------------------------------------------------------------------------------------------------------------------------------------------------------------------|---------------------------------|----------------------------------------------------------|
| Level of Risk        | Presenting Problem(s)                                                                                                                                                                                                     | Diagnostic Procedure(s) Ordered | Management Options Selected                              |
| <i>Minimal</i>       | One self-limited or minor problem                                                                                                                                                                                         | Venipuncture; EKG; urinalysis   | Rest                                                     |
| <i>Low</i>           | Two or more self-limited or minor problems;<br>One stable chronic illness;<br>Acute uncomplicated illness                                                                                                                 | Arterial puncture               | OTC drugs                                                |
| <i>Moderate</i>      | One or more chronic illnesses with mild exacerbation, progression, or side effects;<br>Two or more stable chronic illnesses;<br>Undiagnosed new problem with uncertain prognosis;<br>Acute illness with systemic symptoms |                                 | Prescription drug management                             |
| <i>High</i>          | One or more chronic illnesses with severe exacerbation, progression, or side effects;<br>Acute or chronic illnesses that pose a threat to life or bodily function                                                         |                                 | Drug therapy requiring intensive monitoring for toxicity |

|                                       | Problem Points | Data Points | Risk     | Complexity of Medical Decision Making |
|---------------------------------------|----------------|-------------|----------|---------------------------------------|
| 2/3 elements must be met or exceeded: | 0-1            | 0-1         | Minimal  | <i>Straightforward</i>                |
|                                       | 2              | 2           | Low      | <i>Low</i>                            |
|                                       | 3              | 3           | Moderate | <i>Moderate</i>                       |
|                                       | 4              | 4           | High     | <i>High</i>                           |

**CPT Codes**

| <b>New Patient Office</b><br>(requires 3 of 3)   |         |      |                 | <b>Established Patient Office</b><br>(requires 2 of 3) |         |      |                 |
|--------------------------------------------------|---------|------|-----------------|--------------------------------------------------------|---------|------|-----------------|
| CPT Code                                         | History | Exam | MDM             | CPT Code                                               | History | Exam | MDM             |
| 99201                                            | PF      | PF   | Straightforward | 99211                                                  | N/A     | N/A  | N/A             |
| 99202                                            | EPF     | EPF  | Straightforward | 99212                                                  | PF      | PF   | Straightforward |
| 99203                                            | DET     | DET  | Low             | 99213                                                  | EPF     | EPF  | Low             |
| 99204                                            | COMP    | COMP | Moderate        | 99214                                                  | DET     | DET  | Moderate        |
| 99205                                            | COMP    | COMP | High            | 99215                                                  | COMP    | COMP | High            |
| <b>Initial Hospital/PHP</b><br>(requires 3 of 3) |         |      |                 | <b>Subsequent Hospital/PHP</b><br>(requires 2 of 3)    |         |      |                 |
| CPT Code                                         | History | Exam | MDM             | CPT Code                                               | History | Exam | MDM             |
| 99221                                            | DET     | DET  | Straightforward | 99231                                                  | PF      | PF   | Straightforward |
| 99222                                            | COMP    | COMP | Moderate        | 99232                                                  | EPF     | EPF  | Moderate        |
| 99223                                            | COMP    | COMP | High            | 99233                                                  | DET     | DET  | High            |
